# Supplementary material
Source: PubMed Central journal article supplement (PMC4586174)
Supplement: NIHMS713845-supplement-Web_Table_1.pdf [file NIHMS713845-supplement-Web_Table_1.pdf]

**Web Table 1. State-Specific Estimates of Health Behavior among US Youth<sup>a</sup> and Adults<sup>b</sup>**

| State                | US Youth               |                                         | US Adults              |                                         |
|----------------------|------------------------|-----------------------------------------|------------------------|-----------------------------------------|
|                      | % obese <sup>c</sup> , | % physically<br>inactive <sup>d</sup> , | % obese <sup>e</sup> , | % physically<br>inactive <sup>f</sup> , |
|                      | 2009                   | 2009                                    | 2010                   | 2010                                    |
| Alabama              | 13.5                   | 22.4                                    | 30.9                   | 29.8                                    |
| Alaska               | 11.8                   | 16.2                                    | 24.3                   | 22.6                                    |
| Arizona              | 13.1                   | 15.6                                    | 23.8                   | 19.5                                    |
| Arkansas             | 14.4                   | 19.5                                    | 30.2                   | 29.1                                    |
| California           | na                     | na                                      | 23.9                   | 20.6                                    |
| Colorado             | 7.1                    | 11.3                                    | 20.7                   | 18.3                                    |
| Connecticut          | 10.4                   | 14                                      | 22.1                   | 20.3                                    |
| Delaware             | 13.7                   | 19.7                                    | 27.7                   | 23.6                                    |
| District of Columbia | na                     | na                                      | 21.5                   | 19.6                                    |
| Florida              | 10.3                   | 19.4                                    | 25.9                   | 22.7                                    |
| Georgia              | 12.4                   | 17.6                                    | 28                     | 25.7                                    |
| Hawaii               | 14.5                   | 18.3                                    | 23.2                   | 18.9                                    |
| Idaho                | 8.8                    | 10.8                                    | 26.1                   | 19.8                                    |
| Illinois             | 11.9                   | 16.5                                    | 27.5                   | 25.4                                    |
| Indiana              | 12.8                   | 19.5                                    | 29.1                   | 26.3                                    |
| Iowa                 | na                     | na                                      | 28                     | 24.2                                    |
| Kansas               | 12.4                   | 14.4                                    | 29                     | 23.6                                    |
| Kentucky             | 17.6                   | 17                                      | 30.7                   | 28.6                                    |
| Louisiana            | 14.7                   | 18.5                                    | 31                     | 30                                      |
| Maine                | 12.5                   | 18                                      | 26.4                   | 21.9                                    |
| Maryland             | 12.2                   | 18.5                                    | 26.7                   | 22.9                                    |
| Massachusetts        | 10.9                   | 23.3                                    | 21.9                   | 20                                      |
| Michigan             | 11.9                   | 14.2                                    | 30.6                   | 23.1                                    |
| Minnesota            | na                     | na                                      | 24.6                   | 19                                      |
| Mississippi          | 18.3                   | 21.2                                    | 33.8                   | 32.5                                    |
| Missouri             | 14.4                   | 14.7                                    | 30.1                   | 26.7                                    |
| Montana              | 10.4                   | 13.4                                    | 22.4                   | 21                                      |
| Nebraska             | na                     | na                                      | 26.6                   | 24.4                                    |
| Nevada               | 11                     | 14.2                                    | 22                     | 22.9                                    |
| New Hampshire        | 12.4                   | 13.2                                    | 24.4                   | 19.7                                    |
| New Jersey           | 10.3                   | 18.3                                    | 23                     | 26.2                                    |
| New Mexico           | 13.5                   | 15.5                                    | 25.4                   | 21.3                                    |
| New York             | 11                     | 17                                      | 23.4                   | 23.3                                    |
| North Carolina       | 13.4                   | 15.4                                    | 27.5                   | 25.4                                    |
| North Dakota         | 11                     | 13.7                                    | 27.3                   | 24.4                                    |
| Ohio                 | na                     | na                                      | 28.6                   | 25.5                                    |
| Oklahoma             | 14.1                   | 16.3                                    | 30                     | 29.4                                    |
| Oregon               | na                     | na                                      | 26.3                   | 17.2                                    |
| Pennsylvania         | 11.8                   | 13.1                                    | 27.6                   | 24.6                                    |
| Rhode Island         | 10.4                   | 13.3                                    | 25.6                   | 23.8                                    |
| South Carolina       | 16.7                   | 21.3                                    | 31.6                   | 27                                      |
| South Dakota         | 9.6                    | 14                                      | 27.2                   | 24.2                                    |
| Tennessee            | 15.8                   | 17.7                                    | 29.6                   | 28.8                                    |
| Texas                | 13.6                   | 16                                      | 30.2                   | 26.5                                    |
| Utah                 | 6.4                    | 10.5                                    | 23.1                   | 18.4                                    |
| Vermont              | 12.2                   | 13.2                                    | 22.9                   | 17.4                                    |
| Virginia             | na                     | na                                      | 25.4                   | 23.1                                    |
| Washington           | na                     | na                                      | 25.1                   | 18.2                                    |
| West Virginia        | 14.2                   | 17.3                                    | 32.6                   | 32.1                                    |
| Wisconsin            | 9.3                    | 12.9                                    | 25.5                   | 22.8                                    |
| Wyoming              | 9.8                    | 13.6                                    | 24.8                   | 21.8                                    |

---

na indicates not available

<sup>a</sup> Source: Centers for Disease Control and Prevention. Youth Risk Behavior Surveillance System (YRBSS) — United States, 2009; state percentages are from state YRBSS surveys.

<sup>b</sup> Source: Centers for Disease Control and Prevention. Behavioral Risk Factor Surveillance System (BRFSS) — United States, 2010; unadjusted data.

<sup>c</sup> Students who were  $\geq 95$ th percentile for body mass index (calculated as weight in kilograms divided by height in meters squared), by age and sex, based on the 2000 CDC BMI-for-age growth charts.

<sup>d</sup> Percentage of students in grades 9-12 who did not participate in at least 60 minutes of physical activity on 0 days during the 7 days before the survey. Physical activity was defined as students doing any kind of physical activity that increased heart rate and made them breathe hard some of the time.

<sup>e</sup> Adults who had body mass index  $\geq 30$  kg/m<sup>2</sup>.

<sup>f</sup> Adults who did not participate in any moderate or vigorous-intensity aerobic activity for at least 10 minutes at a time.
